# Supplementary figures and images for: Identification of Prognosis‐Related Genes in Bladder Cancer Microenvironment across TCGA Database
Source: Hindawi journal article supplement (doi:10.1155/2020/9143695), 2020-01-01

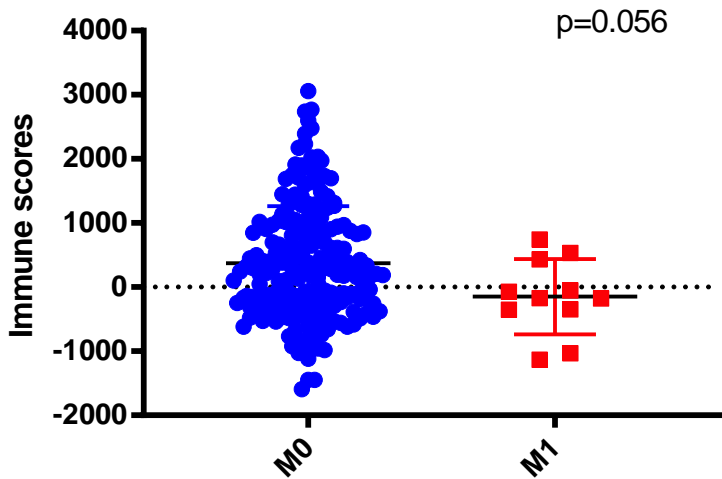

Supplement: f1 [file 9143695.f1.zip]

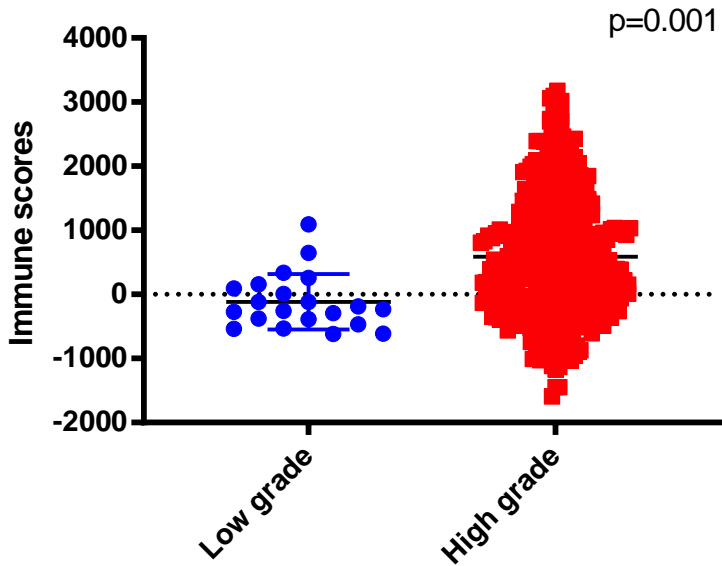

Supplement: f1 [file 9143695.f1.zip]

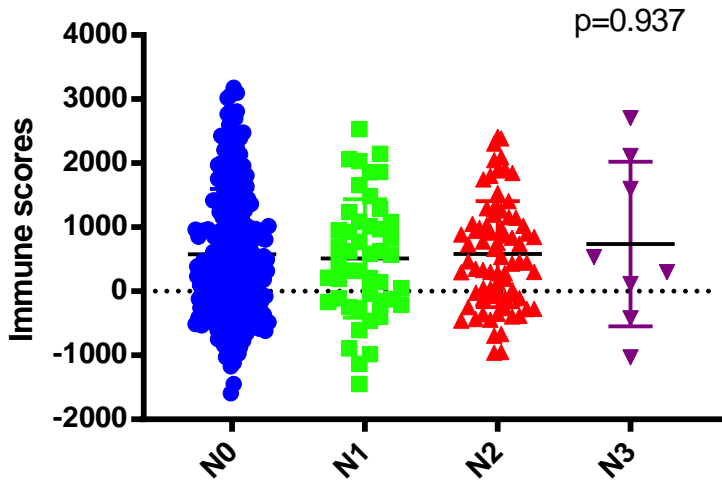

Supplement: f1 [file 9143695.f1.zip]

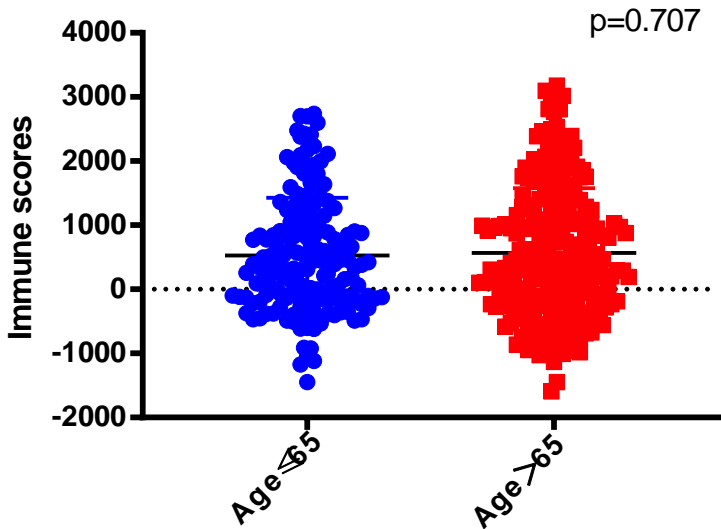

Supplement: f1 [file 9143695.f1.zip]

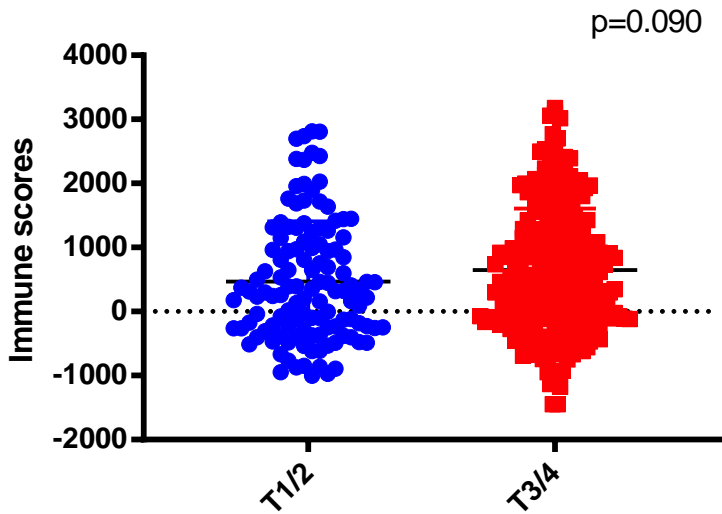

Supplement: f1 [file 9143695.f1.zip]

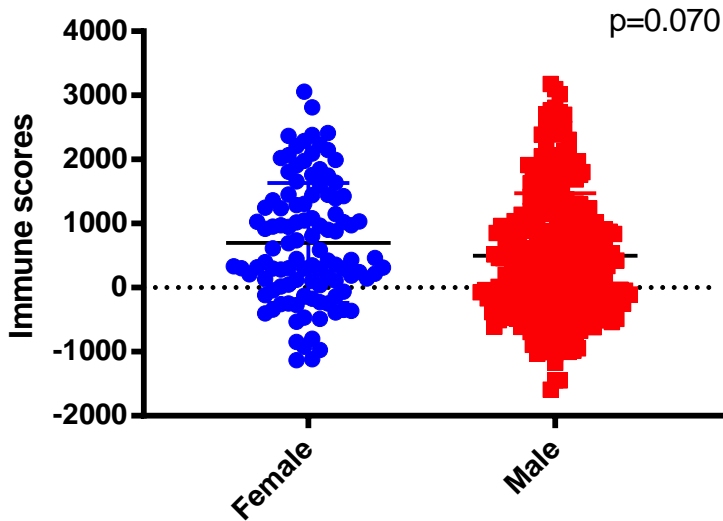

Supplement: f1 [file 9143695.f1.zip]
